# Supplementary material for: Origin and evolutionary history of domestic chickens inferred from a large population study of Thai red junglefowl and indigenous chickens
Source: PubMed Central journal article supplement (PMC7820500; doi:10.1038/s41598-021-81589-7), 2021-01-21
Supplement: 41598_2021_81589_MOESM2_ESM.pdf [file 41598_2021_81589_MOESM2_ESM.pdf]

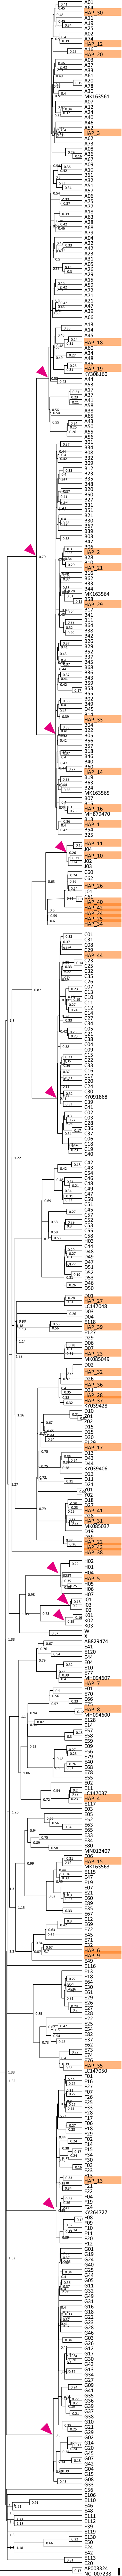

A

B

J

C

D (ZY)

HIKWX

E

F

G

E

*Gallus varius*

Fig. S1
